# Supplementary material
Source: PubMed Central journal article supplement (PMC5510710)
Supplement: mmc1.pdf [file mmc1.pdf]

**Biophysical Journal, Volume 113**

**Supplemental Information**

**A Cardiomyopathy Mutation in the Myosin Essential Light Chain Alters  
Actomyosin Structure**

**Piyali Guhathakurta, Ewa Prochniewicz, Osha Roopnarine, John A. Rohde, and David D.  
Thomas**

# A Cardiomyopathy Mutation in the Myosin Essential Light Chain Alters Actomyosin Structure

Piyali Guhathakurta, Ewa Prochniewicz, Osha Roopnarine, John A. Rohde and David D. Thomas\*

Department of Biochemistry, Molecular Biology and Biophysics, University of Minnesota, Minneapolis, MN 55455

## SUPPORTING MATERIAL

**TR-FRET data analysis.** Fluorescence waveforms were analyzed using non-linear least-squares fitting as described previously

(1,2). The observed donor-only waveform  $F_{D\text{obs}}(t)$  was fitted by a simulation  $F_{D\text{sim}}(t)$ , consisting of a multiexponential decay  $F_D(t)$  (Fig 2, black) convolved with the instrument response function  $IRF(t)$ .

$$F_D(t) = \sum_{i=1}^n A_i \exp(-t/\tau_{Di}),$$

$$F_{D\text{sim}}(t) = \int_{-\infty}^{+\infty} IRF(t-t') F_D(t') dt',$$

**Eq. S1**

where  $\tau_{Di}$  are the donor-only fluorescence lifetimes (Fig. S1). The ensemble-average lifetime is given by

$$\langle \tau_D \rangle = \frac{\sum_{i=1}^n A_i \tau_{Di}}{\sum_{i=1}^n A_i}$$

**Eq. S2**

The observed donor + acceptor waveform  $F_{D+A\text{obs}}(t)$  was fitted by a multiexponential function using the same approach. The model-independent ensemble-average FRET efficiency  $\langle E \rangle$ , which is equivalent to the result of a steady-state fluorescence measurement (3), is given by

$$\langle E \rangle = 1 - \langle \tau_{D+A} \rangle / \langle \tau_D \rangle.$$

**Eq. S3**

To resolve structural states, a distribution of donor-acceptor distances  $\rho(r)$  was assumed:

$$F_{DA}(t) = \int_{-\infty}^{+\infty} \rho(R) \cdot \sum_{i=1}^n A_i \exp\{(-t/\tau_{Di})(1+[R_{0i}/R]^6)\} dR,$$

**Eq. S4**

where  $R_{0i}$  is the lifetime-weighted Förster distance.

$$R_{0i}^6 = 9780^6 J \kappa^2 n^{-4} k_{\text{rad}} \tau_{Di}$$

**Eq. S5**

where  $J$  is the overlap integral between the donor emission and acceptor absorption spectra,  $n$  is the refractive index (1.4),  $\kappa^2$  is the orientation factor (2/3, assuming random orientation), and  $k_{\text{rad}}$  is the radiative decay rate for the donor. Eq. S5 follows directly from the Förster theory's assumption (1) that the energy transfer rate constant  $k_T$  ( $= R_{0i}^6 R^{-6} / \tau_{Di}$ ) depends on the donor-acceptor distance  $R$  but not on the donor-only lifetime  $\tau_{Di}$ .  $R_0$  between IAEDANS actin and

Dabcyl S1 was calculated as 3.3 nm, with a quantum yield 0.32 for IAEDANS actin (using quinine sulfate as the standard).

The distance distribution  $\rho(R)$  (Eq. S4) was assumed to be a sum of  $n$  Gaussian components, each corresponding to a structural state of the actomyosin complex, with its central distances  $R_j$ , and a full width at half maximum  $\Gamma_j$  and mole fraction  $x_j$ :

$$\rho(R) = \sum_{j=1}^n x_j \sigma_j^{-1} (2\pi)^{-1/2} \exp(-[(R-R_j)/(2\sigma_j)]^2), \quad \sigma_j = \Gamma_j/[2*(2 \ln 2)^{1/2}], \quad \text{Eq. S6}$$

$$\sum_{j=1}^n x_j = 1.$$

The observed waveform  $F_{D+Aobs}(t)$  was fitted by  $F_{D+A sim}(t)$ :

$$F_{D+A}(t) = (1 - X_B)F_D(t) + X_B F_{DA}(t),$$

$$F_{D+A sim}(t) = \int_{-\infty}^{+\infty} IRF(t-t') \cdot F_{D+A}(t') dt', \quad \text{Eq. S7}$$

where  $X_B$  is the fraction of donor-labeled actin bound to and transferring energy to acceptor-labeled myosin. Thus binding ( $X_B$ ) is determined independently of the mole fractions of resolved structural states ( $x_j$  in Eq. S6).

**Donor-only fluorescence decays are best fit with 3 exponential components.** The donor-only fluorescence decay  $F_D(t)$  for IAEDANS actin (Fig.3), was fitted by a multiexponential function, with the result that three lifetime components are necessary and sufficient to fit the data (Eq. S1,  $n = 3$ ), based on the residual plots (Fig. S1A) and the  $\chi^2$  values (sum of residuals at each data point Fig. S1B). The results show clearly that the fit is improved by increasing  $n$  from 2 to 3, but not by increasing  $n$  from 3 to 4. FRET efficiency ( $E$ ) was calculated from average lifetime in model-independent analysis (Fig. 4), and the calculated interprobe distance from  $E$  was in good agreement with the  $R$  value obtained from model-dependent analysis described below and in methods. To increase precision in the FRET analysis, the three donor lifetime values were globally linked in model-dependent fitting.

**Strongly bound complex shows best fit with a single attached state.** To resolve structural states of the actomyosin complex in the absence of ATP, we used  $F_D(t)$  as input, to fit  $F_{D+Aobs}(t)$  and thus determine the mole-fraction of unbound donor ( $1-X_B$ ) and interprobe distance distribution corresponding to the bound complex,  $F_{DA}(t)$  (Eq. S4-Eq. S7). The goodness of fit

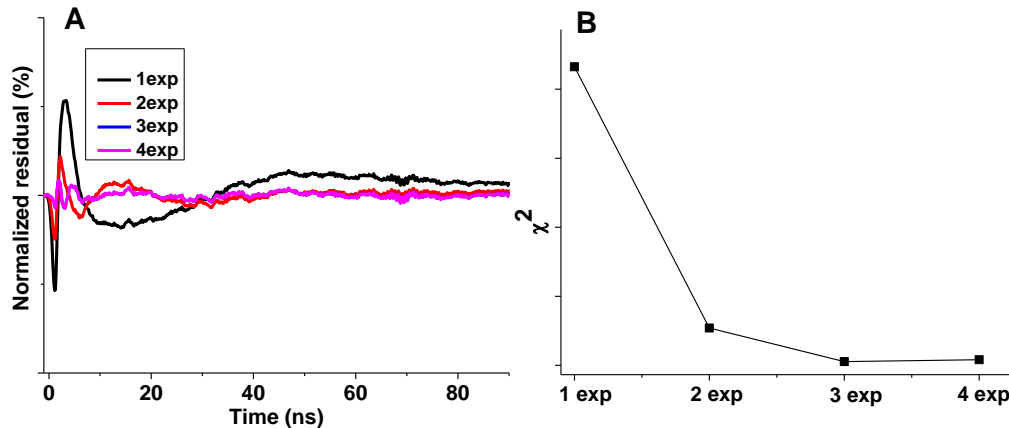

**Fig. S1.** Fluorescence lifetime fit of IAEDANS actin. (A). Normalized residual plot of fits with increasing  $n$  in (B).  $\chi^2$  values of lifetime components, showing that  $n = 3$  is necessary and sufficient for the best fit to Eq. S1.

was evaluated to minimize  $\chi^2$ , and the best fit to  $F_{DA}(t)$  for the bound complex was obtained with a one-Gaussian component. A second Gaussian component did not improve the fit. Thus, in the rigor (no ATP) state, actomyosin is best described by a two-state model: a mole fraction  $(1-X_B)$  of unbound donor and a mole fraction  $X_S$  of the  $S$  state with a mean distance  $R_S$  and a FWHM of  $\Gamma_S$ . The distance ( $R_S$ ) and width ( $\Gamma_S$ ) were independent of the added myosin concentration (1-10  $\mu\text{M}$ ) to 2  $\mu\text{M}$  actin (Fig. S2). In subsaturating conditions, the value of the mole fraction  $X_S$  obtained from the fitting was indistinguishable from the added myosin concentration; i.e.,  $X_B = X_S$ . In the presence of excess myosin,  $X_B$  was indistinguishable from 1.

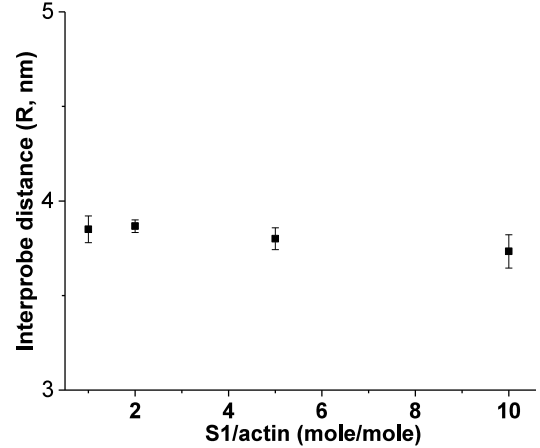

Fig. S2. Interprobe distance is independent of myosin concentrations in  $S$  complexes

### Three states are necessary and sufficient to fit

**the steady-state TR-FRET data.** To resolve structural states of the actomyosin complex in the presence of ATP, we also used  $F_D(t)$  as input, to fit  $F_{D+Aobs}(t)$  and determine the mole-fraction of unbound donor ( $1-X_B$ ) and the interprobe distance distribution corresponding to  $F_{DA}(t)$  (Eq. S4-Eq. S7). We tested models for  $F_{DA}(t)$  with one, two, and three Gaussian components (Eq. S6  $n = 1, 2,$  and  $3$ ). The goodness of fit was evaluated to minimize  $\chi^2$ . The fit was consistently improved by increasing the number of components  $n$  in from 1 to 2, but not from 2 to 3 as described in our previous study (4). Thus two-Gaussian distance distributions were required to fit the TR-FRET data. We assumed that during the steady state of ATP hydrolysis the actomyosin complex is a mix of pre ( $W$ ) and post power stroke ( $S$ ) structural states represented by Gaussian distance distributions  $\rho_W$  and  $\rho_S$  with mole fractions  $X_W$  and  $X_S$  (Fig 5). Thus the actin-bound distance distribution is

$$\rho(R) = (X_W/X_B)\rho_W(R) + (X_S/X_B)\rho_S(R). \quad \text{Eq. S8}$$

Thus in the presence of ATP, actomyosin is best described by a 3-state model: a mole fraction  $(1-X_B)$  of unbound donor, with the bound state (mole fraction  $X_B$ ) described by a two-Gaussian distance distribution described by mole fraction  $X_S$  of the bound  $S$  state with a mean distance  $R_S$  and a FWHM of  $\Gamma_S$ , and a mole fraction  $X_W (= X_B - X_S)$  of the bound  $W$  state, with a mean distance  $R_W$  and a FWHM of  $\Gamma_W$  (Fig 5, red). The results are summarized in Fig 5. No improvement in the fit (decrease in  $\chi^2$ ) was obtained by allowing the  $S$  state parameters ( $R_S, \Gamma_S$ ) to vary from the values observed in the absence of ATP (Fig. S6), so these parameters were fixed to those values in the analysis shown in Fig 5. The same two-Gaussian analysis was successfully applied previously to analyze FRET within smooth muscle myosin regulatory light chain (1) and the myosin relay helix (5), generating high-resolution structural information that was confirmed by independent molecular dynamics simulations (1) or by dipolar electron–electron resonance (DEER) EPR spectroscopy(5).

**Mass Spectrometry.** Mass spectrometry data (Fig S7) was acquired using a QSTAR quadrupole-TOF mass spectrometer with an electrospray ionization source. The unlabeled and labeled protein sample (2 mg/ml hVELC in 10 mM  $\text{NH}_4\text{HCO}_3$  buffer at pH 7.9) was injected into the solvent stream by using a 10  $\mu\text{l}$  injection loop installed in the integrated loop injector. Three to five injections were performed for every sample, with 2-min intervals between them. Data were acquired continuously during load buffer infusion and protein infusions over the range 500–2,000  $m/z$ . Spectra were analyzed with AnalystQS (Applied Biosystems) software.

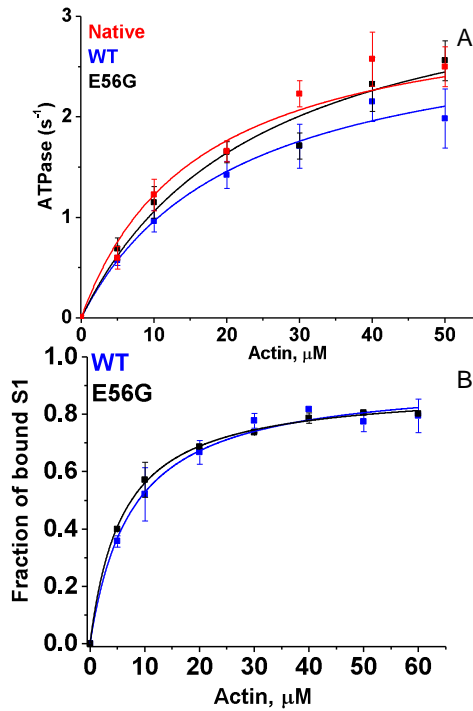

**Fig. S3.** (A) Actin-activated ATPase activity of cardiac myosin S1 constructs. (B) Binding of labeled myosin S1 constructs to labeled actin in the presence of saturating ATP, measured by co-sedimentation assays.  $V_{max}$ ,  $K_{ATPase}$  and  $K_d$  values are summarized in Table 1.

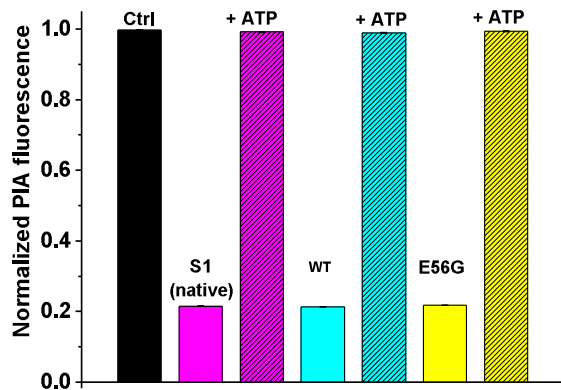

**Fig. S4.** Interaction of cardiac S1 with pyrene-actin (2 μM). Fluorescence was measured in F-Mg buffer at 25°C and normalized to the value obtained in the absence of S1 (Ctrl, black bar). Steady-state fluorescence in the presence of 10 μM S1 (of these sources, as indicated) was measured in the absence (solid bars) and presence (shaded bars) of 3 mM (which was shown to be saturating) ATP. The results indicate that all three S1 samples quenched pyrene-actin to the same extent in the absence of ATP (within 1%), and no quenching (less than 1%) was observed in the presence of saturating ATP. Thus the E56G mutation has no detectable effect on the actin-myosin interface, as detected by pyrene-actin, in the absence or presence of saturating ATP.

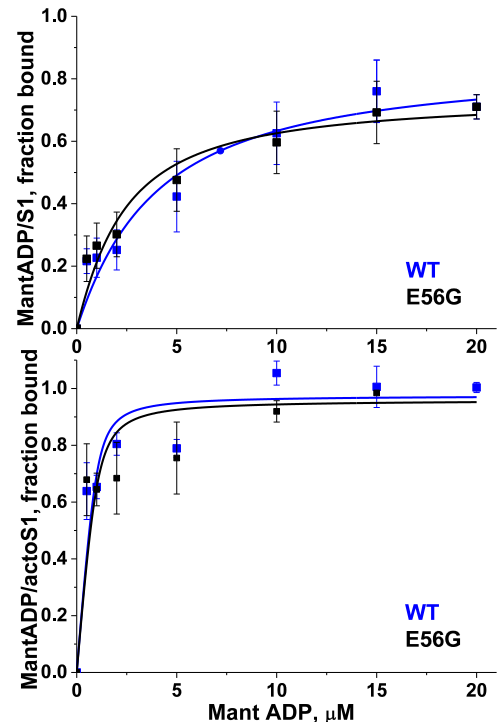

**Fig. S5.** Binding of cardiac myosin S1 constructs to MANT-ADP in the absence (top) and presence (bottom) of actin.

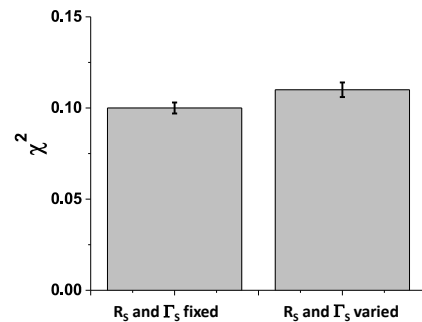

**Fig. S6.**  $\chi^2$  value for the fitting of the strong state (S) state parameters in the presence of ATP. No significant improvement in the fit (decrease in  $\chi^2$ ) was obtained by allowing the S-state parameters ( $R_s$ ,  $\Gamma_s$ ) to vary from the values observed in the absence of ATP.

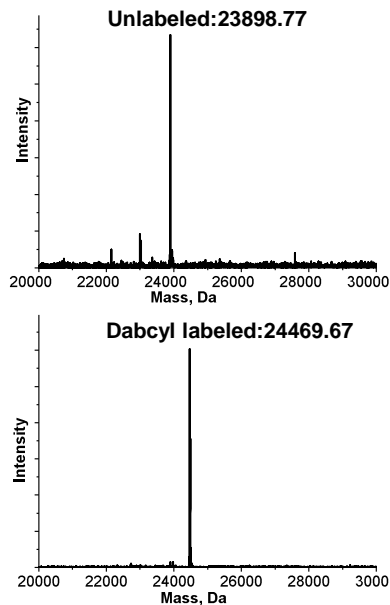

**Fig. S7.** ESI-MS spectra of unlabeled and Dabcyl labeled hVELC. Mass shift of 570.23 Da and absence of the unlabeled peak in the labeled sample shows complete labeling

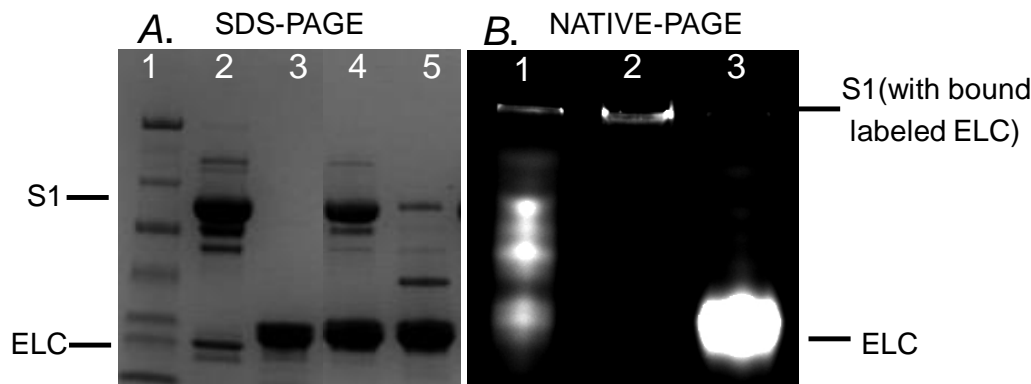

**Fig. S8.** SDS and Native PAGE of labeled and exchanged  $\beta$ -cardiac S1. A. SDS-PAGE. Lane 1: molecular weight marker, Lane 2: S1 before exchange, Lane 3: hVELC. Lane 4: Final S1 with exchanged ELC. Lane 5: Free ELC after spin down with actin. B. Native PAGE. Lane 1: exchanged S1 before free hVELC separation. Lane 2: S1 used for experiment (no free hVELC). Lane 3: Free hVELC. Absence of free hVELC in lane 2 shows that the FRET signal is entirely from S1-bound ELC. Lane 4 in SDS-PAGE corresponds to Lane 2 in Native PAGE.

### SUPPORTING REFERENCES

1. Kast, D., L. M. Espinoza-Fonseca, C. Yi, and D. D. Thomas. 2010. Phosphorylation-induced structural changes in smooth muscle myosin regulatory light chain. *Proc Natl Acad Sci U S A* 107:8207-8212.
2. Muretta, J. M., A. Kyrchenko, A. S. Ladokhin, D. Kast, G. E. Gillispie, and D. D. Thomas. 2010. High-performance time-resolved fluorescence by direct waveform recording. *Rev Sci Instrum* 81:103101-103101 - 103101-103108.
3. Lakowicz, J. R. 1999. *Principles of Fluorescence Spectroscopy*. New York: Kluwer Academic/Plenum Press.
4. Guhathakurta, P., E. Prochniewicz, and D. D. Thomas. 2015. Amplitude of the actomyosin power stroke depends strongly on the isoform of the myosin essential light chain. *Proc Natl Acad Sci U S A* 112:4660-4665.
5. Agafonov, R. V., I. V. Negrashov, Y. V. Tkachev, S. E. Blakely, M. A. Titus, D. D. Thomas, and Y. E. Nesmelov. 2009. Structural dynamics of the myosin relay helix by time-resolved EPR and FRET. *Proc Natl Acad Sci U S A* 106:21625-21630.
